# Supplementary material for: Oral fullerene tablets for colorectal cancer therapy based on modulation of tumor inflammatory microenvironments
Source: Royal Society of Chemistry journal article supplement (doi:10.1039/d2tb01518h), 2022-01-01

## Supplementary data

# Oral Fullerene Tablets for Colorectal Cancer Therapy Based on Modulation of Tumor Inflammatory Microenvironment

Xinran Cao <sup>a,b</sup>, Mingming Zhen <sup>a,b\*</sup>, Lei Li <sup>a,b</sup>, Zhanfeng Wu <sup>a,b</sup>, Chen Zhou <sup>a,b</sup>, Jiawei Huo <sup>a,b</sup>, Shenge Su <sup>a,b</sup>, Yuan Xu <sup>a,b</sup>, Wang Jia <sup>a,b</sup>, Xiaodan Liao <sup>a,b</sup>, Zihao Sun <sup>a,b</sup>, Hui Li<sup>c</sup>, and Chunru Wang <sup>a,b\*</sup>

<sup>a</sup> Beijing National Laboratory for Molecular Sciences, Key Laboratory of Molecular

Nanostructure and Nanotechnology, Institute of Chemistry, Chinese Academy of Sciences,

Beijing 100190, China

<sup>b</sup> University of Chinese Academy of Sciences, Beijing 100049, China

<sup>c</sup> Beijing Fullcan Biotechnology Co. Ltd, Beijing, 100085, China

\*E-mail: zhenmm@iccas.ac.cn, crwang@iccas.ac.cn

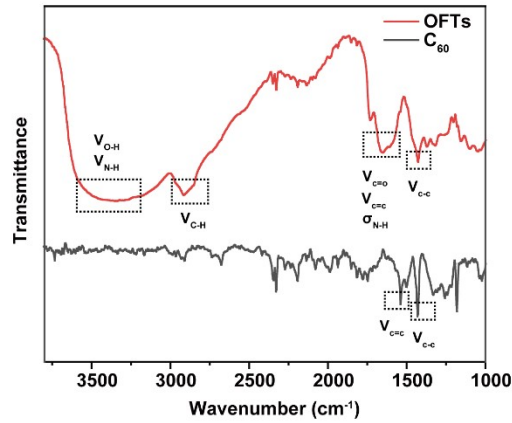

Fig. S1. FT-IR spectrum analysis of OFTs.

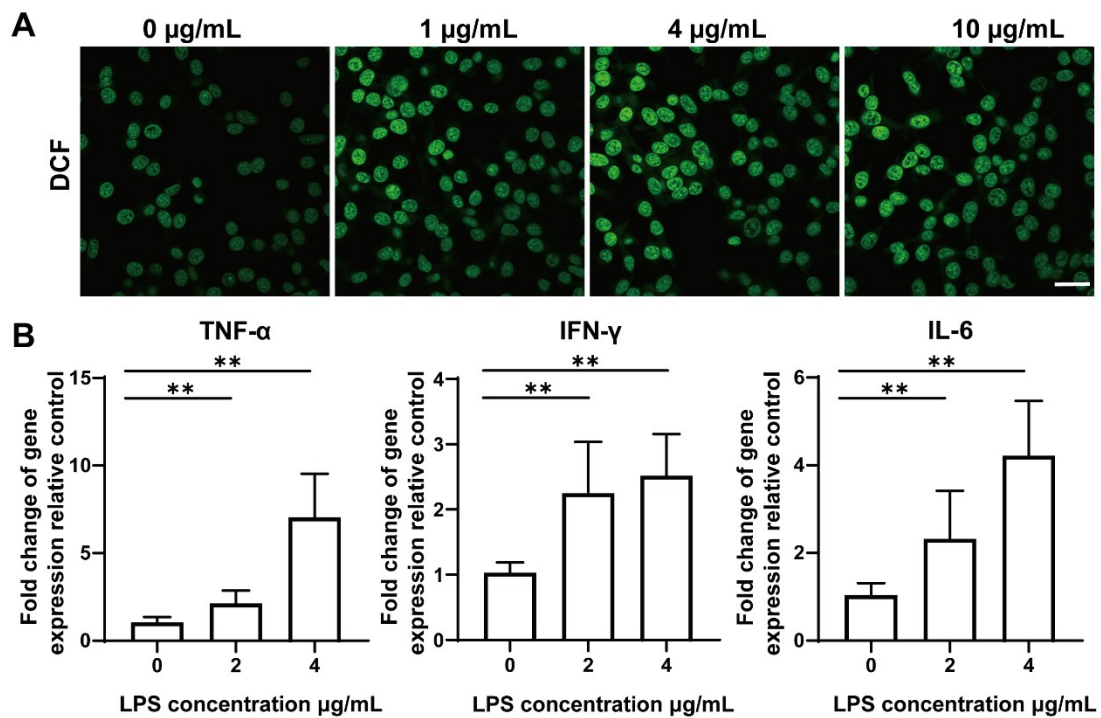

Fig. S2. Establishment of an inflammatory cell model using lipopolysaccharide (LPS) stimulation on CT26 colon cancer cells. (A) Confocal fluorescence images of DCF in CT26 cells with different concentrations of LPS treatment. Scale bar, 30  $\mu$ m. (B) The levels of mRNA expression of inflammatory cytokines (TNF- $\alpha$ , IFN- $\gamma$  and IL-6) in the CT26 cells by different concentrations of LPS treatment. The data are shown as the mean  $\pm$  s.d. \* $p$  < 0.05, \*\* $p$  < 0.01, \*\*\* $p$  < 0.001.

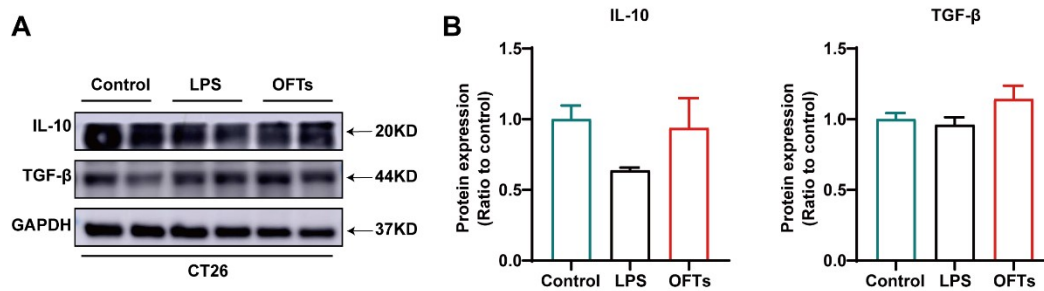

**Fig. S3. Effect of OFTs on anti-inflammatory factors in CT26 cells.** (A-B) The protein expression and quantitative analysis of IL-10 and TGF-β of CT26 cells after different treatments via WB. The data are shown as the mean ± s.d. \* $p < 0.05$ , \*\* $p < 0.01$ , \*\*\* $p < 0.001$ .

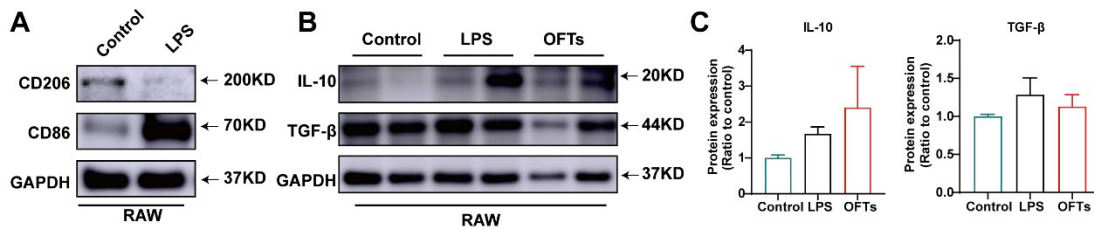

**Fig. S4. Establishment of an inflammatory cell model using lipopolysaccharide (LPS) stimulation on RAW cells.** (A) M2 marker CD206, and M1 marker CD86 protein expressions before and after co-incubation of RAW with LPS. (B-C) The protein expression and quantitative analysis of IL-10 and TGF-β of RAW cells after different treatments via WB. The data are shown as the mean ± s.d. \* $p < 0.05$ , \*\* $p < 0.01$ , \*\*\* $p < 0.001$ .

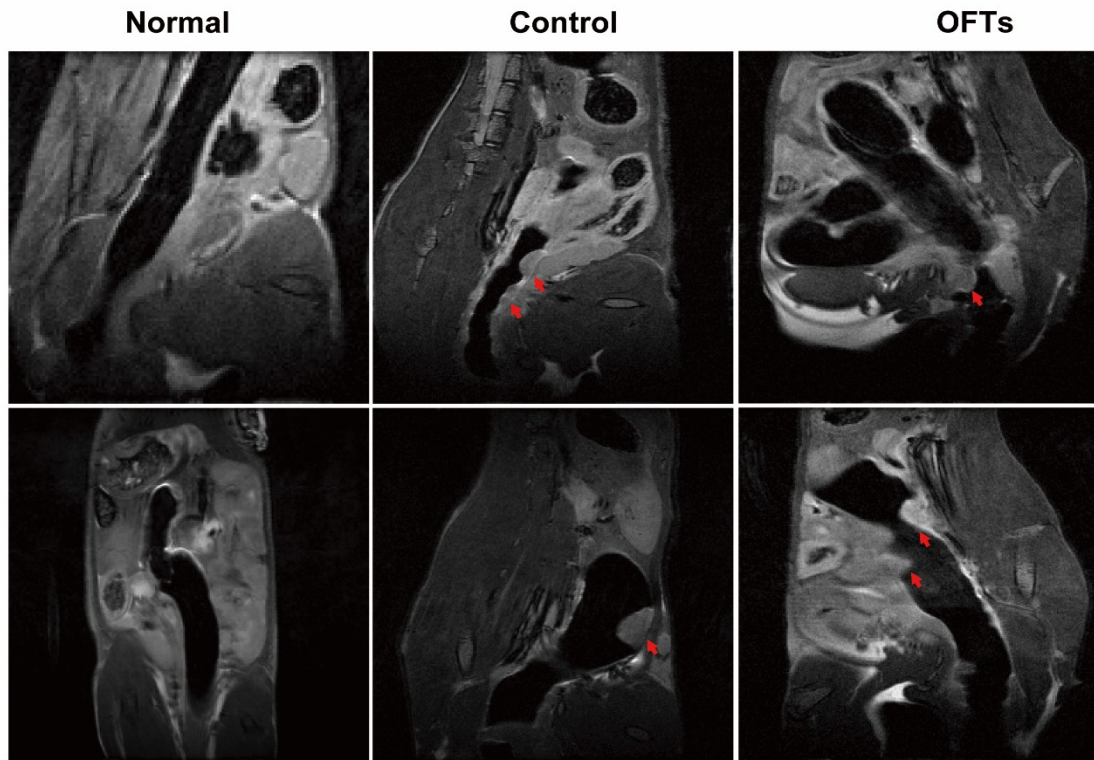

**Fig. S5.** MRI of tumors in the colorectal area of mice (the red arrows refer to the tumors).

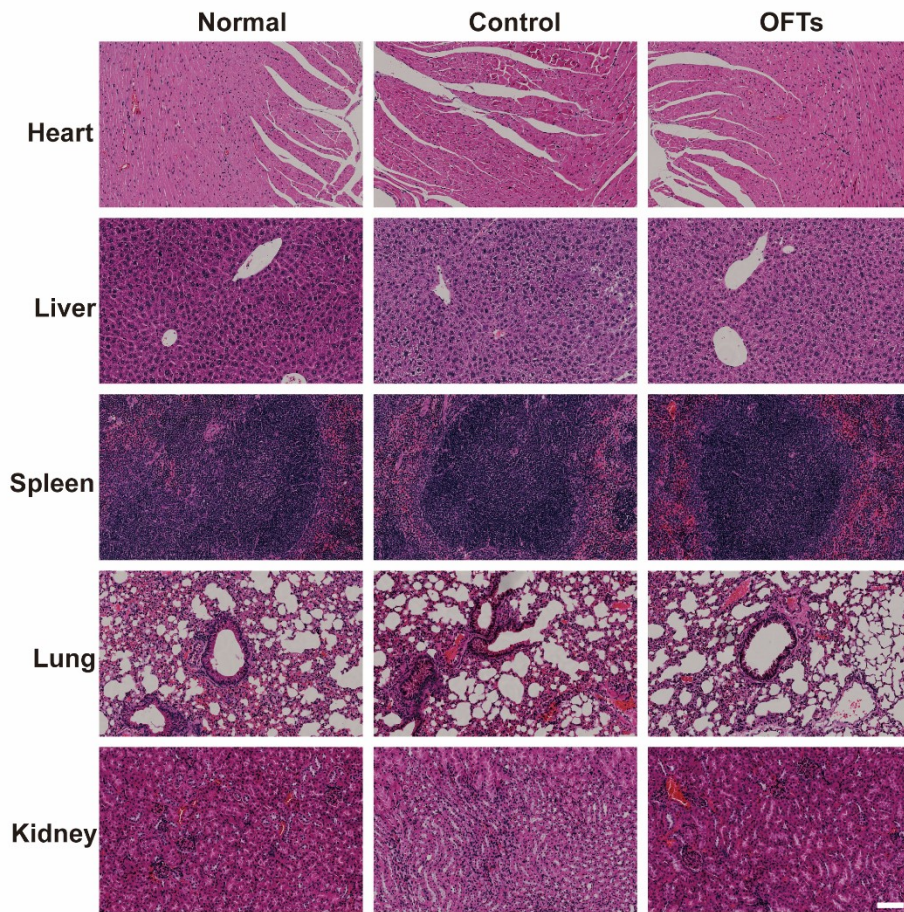

**Fig. S6.** Representative images of H&E staining of heart, liver, spleen, lung, and kidney at the end of treatment. Scale bar, 100  $\mu$ m.

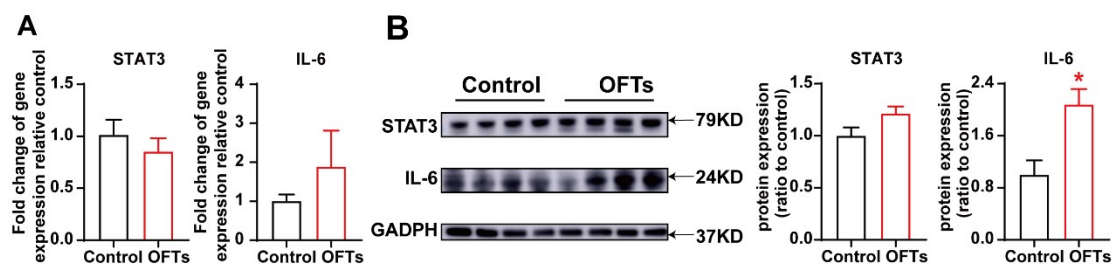

**Fig. S7.** Clearance of inflammation in tumors. **(A)** The gene expression of STAT3 and IL-6 mRNAs compared by qRT-PCR. **(B)** The protein expression and quantitative analysis of STAT3 and IL-6 of tumors treated with OFTs via WB. The data are shown as the mean  $\pm$  s.d. \* $p$  < 0.05, \*\* $p$  < 0.01, \*\*\* $p$  < 0.001.

## Full uncropped Western blots in manuscript

Figure 2

NF- $\kappa$ B

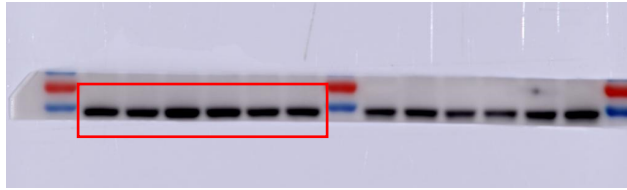

TNF- $\alpha$

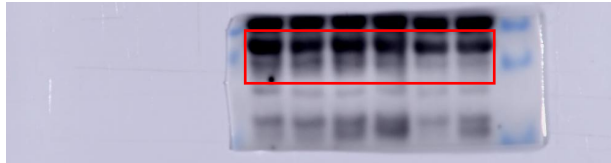

IFN- $\gamma$

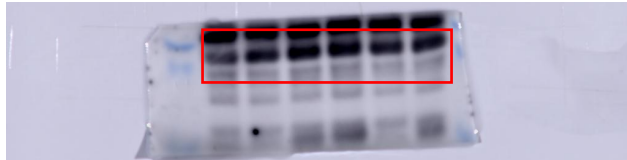

iNOS

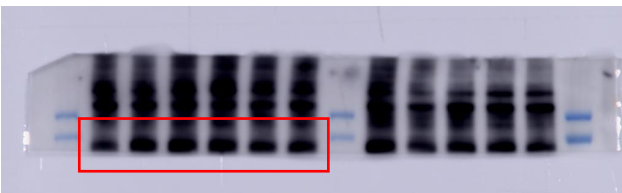

GAPDH

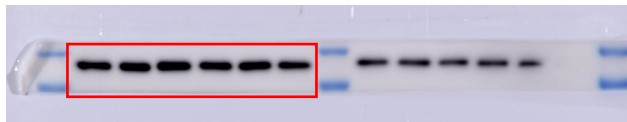

STAT3

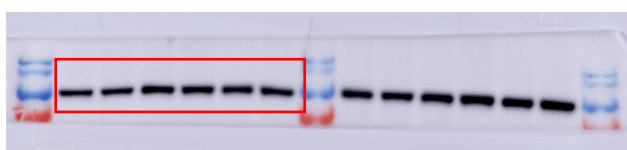

IL-6

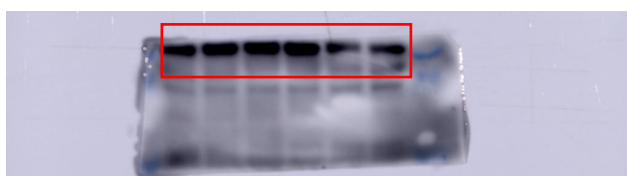

GAPDH

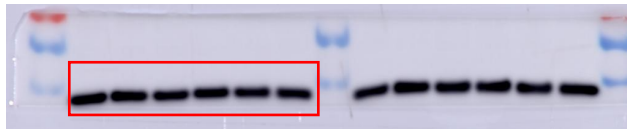

**Figure 3**  
NF-κB

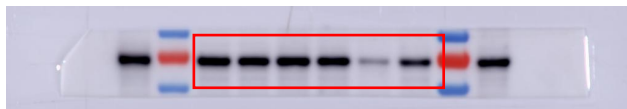

IFN- $\gamma$

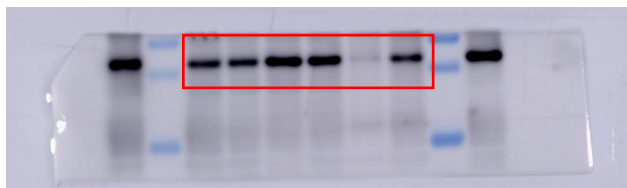

iNOS

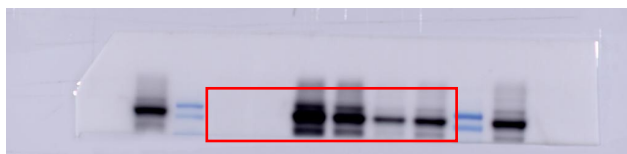

STAT3

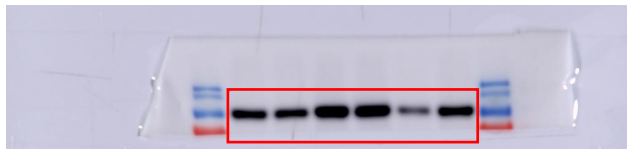

GAPDH

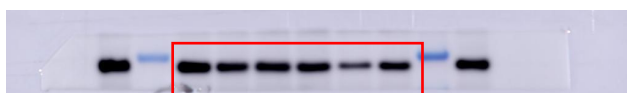

**Figure 5**  
P53

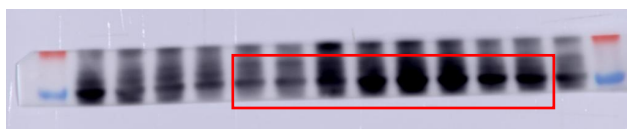

GAPDH

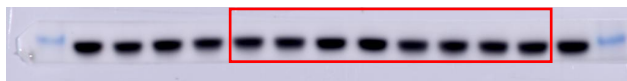

NF- $\kappa$ B

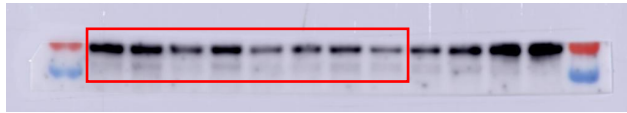

P-IκBα

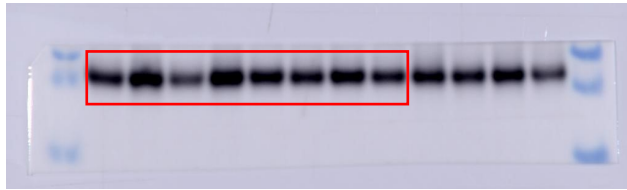

TNF-α

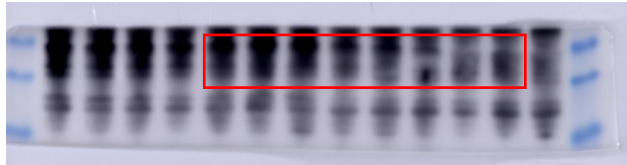

IFN-γ

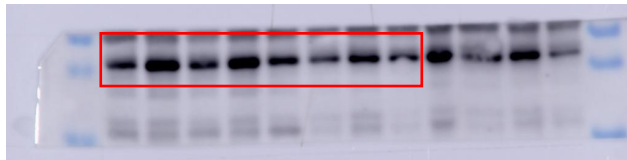

iNOS

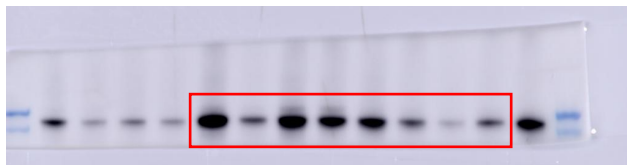

GAPDH

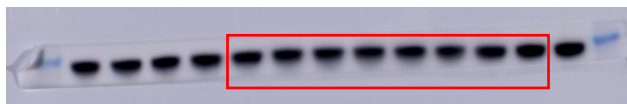

STAT3

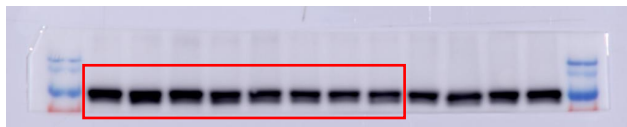

IL-6

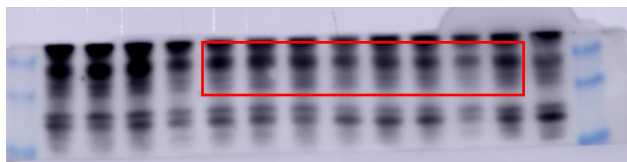

GAPDH

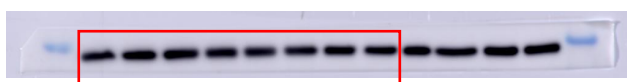

**Figure 6**



P53

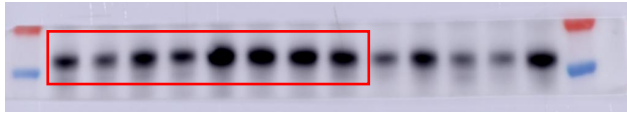

GAPDH

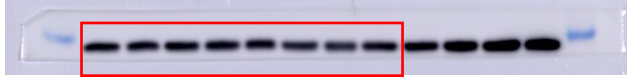

NF- $\kappa$ B

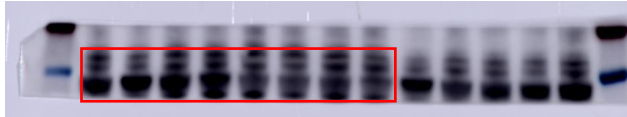

P-I $\kappa$ B $\alpha$

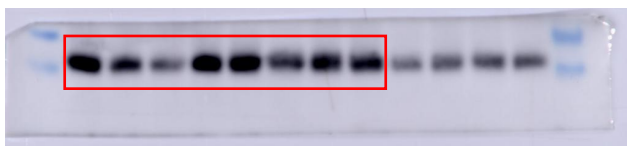

GAPDH

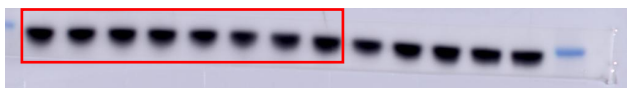

IFN- $\gamma$

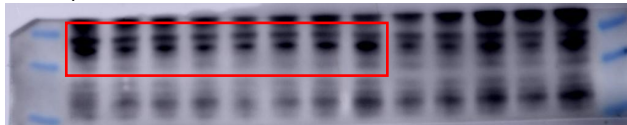

iNOS

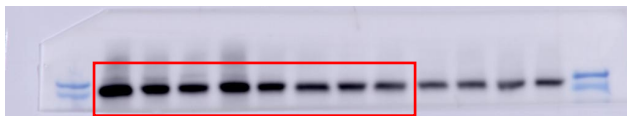

GAPDH

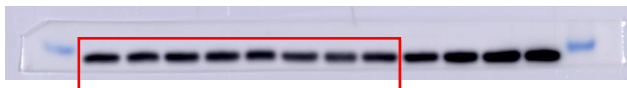

**Figure 7**

CD86

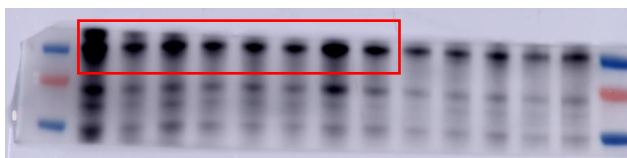

LY6G

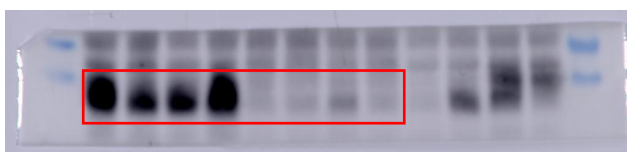

GAPDH

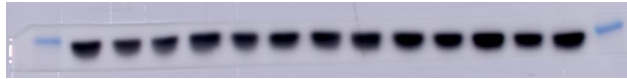

## Full uncropped Western blots in Supporting Information

**Figure S3**

IL-10

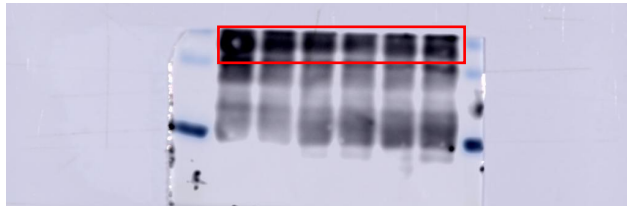

TGF- $\beta$

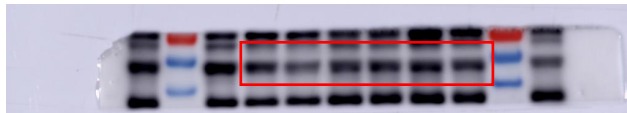

GAPDH

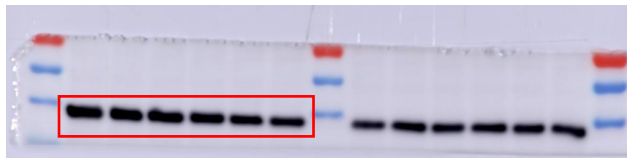

**Figure S4**

CD206

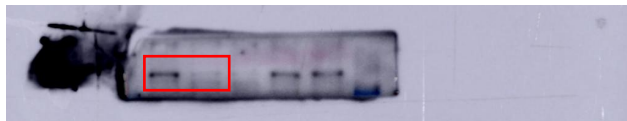

CD86

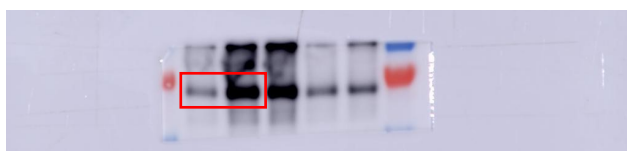

GAPDH

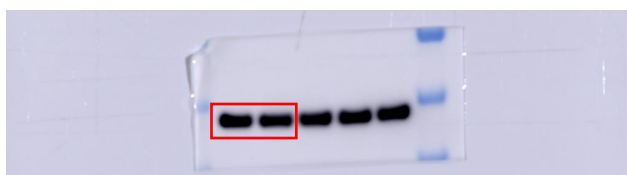

IL-10

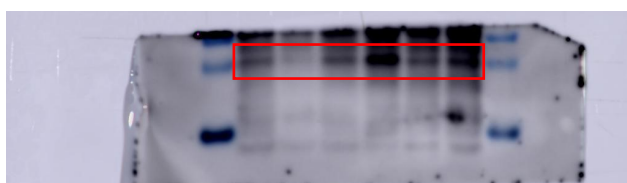

TGF- $\beta$

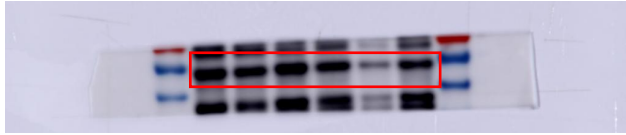

GAPDH

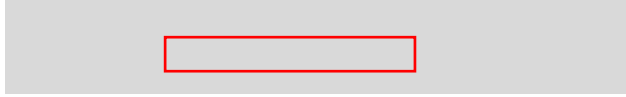

**Figure S7**  
STAT3

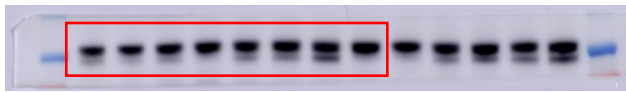

IL-6

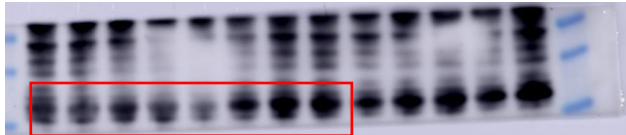

GAPDH

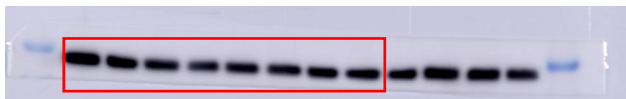

Supplement: d2tb01518h1.pdf [file d2tb01518h1.pdf]
